# Supplementary material for: N-Linked Glycosylation in Chinese Hamster Ovary Cells Is Critical for Insulin-like Growth Factor 1 Signaling
Source: MDPI journal article supplement (doi:10.3390/ijms232314952), 2022-11-29
Supplement: s1 [file s1]

## Supplementary Figures and Tables

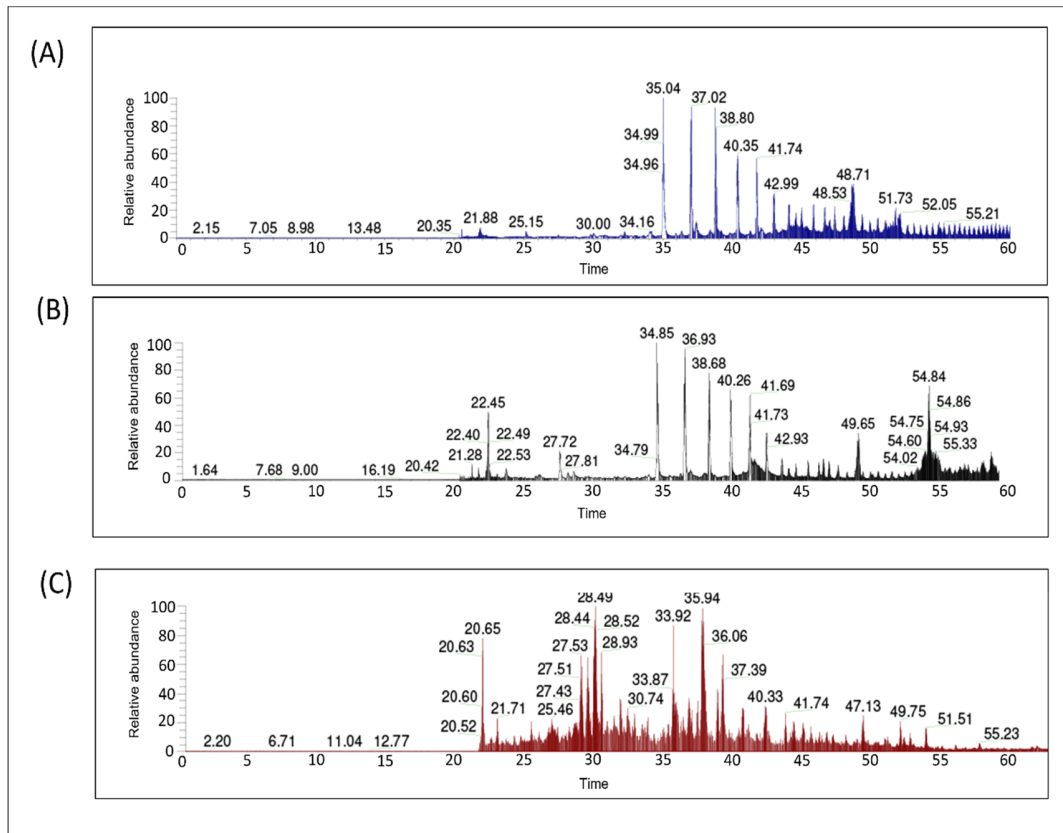

**Figure S1.** Base peak chromatogram of W5, Lec1, and Lec4 cells in high-frequency LCMS observation. Total ion chromatograph of cell surface proteins extracted from (A) W5 or CHO, (B) Mgat1-deficient Lec1 cells, (C) Mgat5-deficient Lec4 cells. Graph shows peaks of relative abundance against time.

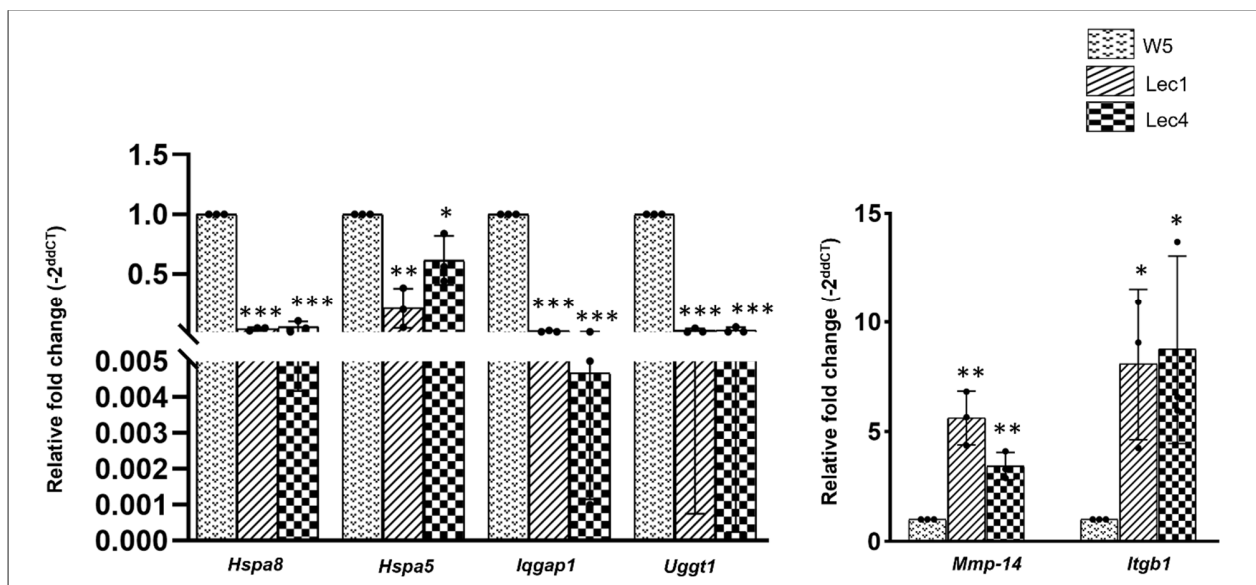

**Figure S2.** Real-time PCR analysis for validation of data obtained through mass spectrometry for W5, Lec1, and Lec4 cells. q-RT PCR for downregulated genes (*Hspa8*, *Hspa5*, *Ugg1*, *Iqgap1*) and upregulated genes (*Mmp14* and *Itgb1*) were quantified and normalized using housekeeping genes (*Gapdh*, *B-Actin*),  $n = 3$ . \*\*\*  $p$  value  $<0.001$ , \*\*  $p$  value  $<0.01$ , and \*  $p$  value  $<0.05$ .

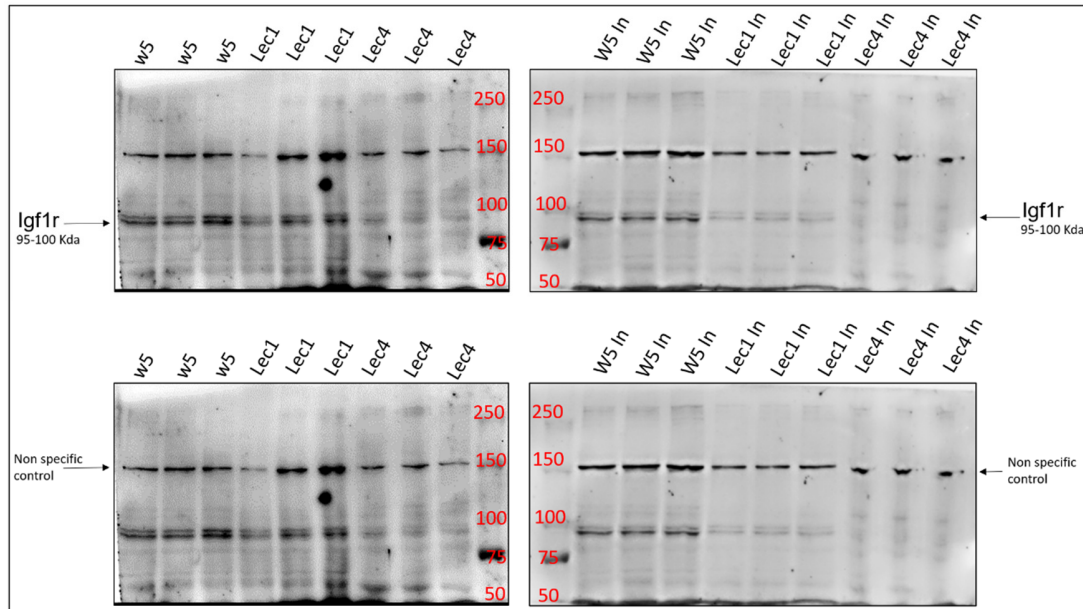

**Figure S3.** Full image for Western blot analysis for IGF-1R and nonspecific band in W5, Lec1, and Lec4 cells with and without stimulation by IGF-1R ligand (IGF-1LR3). Ladder is marked in red and appropriate molecular weight of the protein (IGF-1R) is shown by arrows.

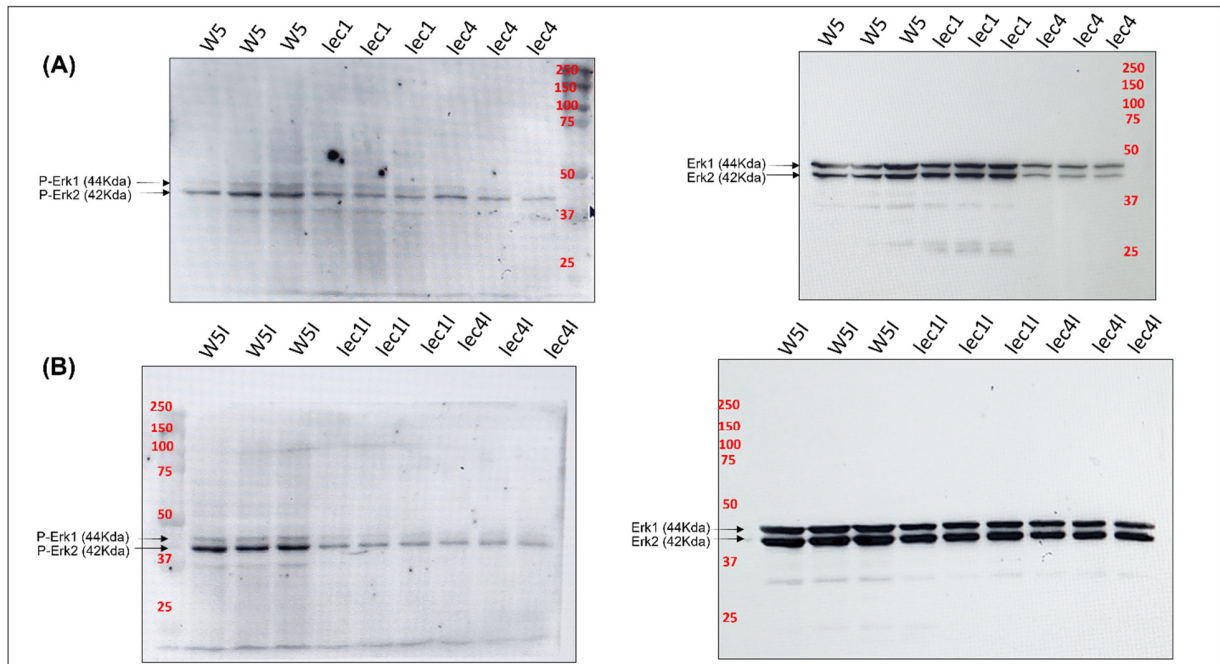

**Figure S4.** Full image for Western blot analysis of pERK1/2, ERK1/2 in W5, Lec1, and Lec4 cells, with noninduced cells (A) and cells induced with IGF-1LR3 (B). Ladder is marked in red and appropriate molecular weight of the protein (IGF-1R) is shown by arrows.

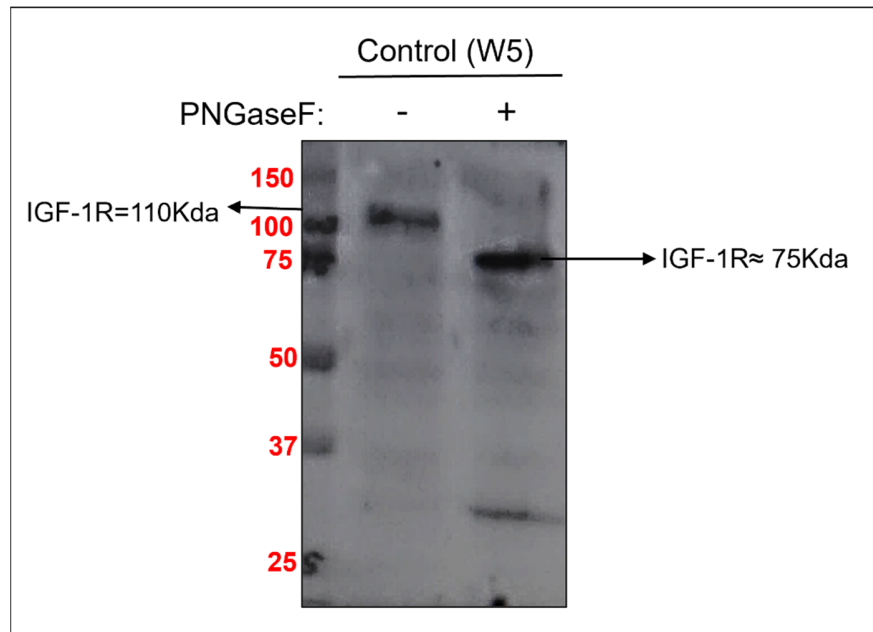

**Figure S5.** Western blot analysis of IGF-1R in W5 cells after PNGaseF treatment for 2 h. In untreated W5 cells, IGF-1R shows a band at 110 Kda. After treatment with PNGaseF, the IGF-1R band was reduced to approximately 75 Kda.

**Supplementary Table S1.** PANTHER classification of molecular function, biological process, and protein class for differentially expressed proteins in W5, Lec1, and Lec4 cells.

| <b>W5 cells</b>                  |                     |                   |
|----------------------------------|---------------------|-------------------|
| <b>Molecular Function</b>        | <b>No of Genes</b>  | <b>Percentage</b> |
| Binding                          | 23                  | 47.91             |
| Catalytic Activity               | 10                  | 20.83             |
| Molecular Function Regulator     | 1                   | 2.083             |
| Molecular Transducer Activity    | 1                   | 2.083             |
| Structural Molecular Activity    | 2                   | 4.166             |
| Translational Regulator Activity | 2                   | 4.166             |
| Transporter Activity             | 2                   | 4.166             |
| <b>Lec1 cells</b>                |                     |                   |
| <b>Molecular Function</b>        | <b>No of Genes</b>  | <b>Percentage</b> |
| Binding                          | 20                  | 51.2              |
| Catalytic Activity               | 10                  | 25.6              |
| Molecular Function Regulator     | 1                   | 2.56              |
| Molecular Transducer Activity    | 1                   | 2.56              |
| Structural Molecular Activity    | 2                   | 5.12              |
| Translational Regulator Activity | 1                   | 2.56              |
| Transporter Activity             | 2                   | 5.12              |
| <b>Lec4 cells</b>                |                     |                   |
| <b>Molecular Function</b>        | <b>No of Genes</b>  | <b>Percentage</b> |
| Binding                          | 22                  | 47.8              |
| Catalytic Activity               | 10                  | 21.7              |
| Molecular Function Regulator     | 1                   | 2.17              |
| Structural Molecular Activity    | 3                   | 6.52              |
| Translational Regulator Activity | 2                   | 4.34              |
| Transporter Activity             | 2                   | 4.34              |
| <b>W5 cells</b>                  |                     |                   |
| <b>Biological Process</b>        | <b>No. of Genes</b> | <b>Percentage</b> |
| Biological Adhesion              | 3                   | 6.25              |
| Biological Regulation            | 10                  | 20.83             |
| Cellular Process                 | 26                  | 54.16             |
| Developmental Process            | 3                   | 6.25              |
| Localization                     | 6                   | 12.5              |
| Locomotion                       | 1                   | 2.083             |
| Metabolic Process                | 11                  | 22.91             |
| Multicellular organismal process | 3                   | 6.25              |
| Response to stimulus             | 11                  | 22.91             |
| Signaling                        | 5                   | 10.41             |
| <b>Lec1 cells</b>                |                     |                   |
| <b>Biological Process</b>        | <b>No. of Genes</b> | <b>Percentage</b> |
| Biological Adhesion              | 2                   | 5.12              |
| Biological Regulation            | 8                   | 20.51             |
| Cellular Process                 | 23                  | 58.97             |
| Developmental Process            | 3                   | 7.69              |

| Localization                              | 5              | 12.82      |
|-------------------------------------------|----------------|------------|
| Locomotion                                | 1              | 2.56       |
| Metabolic Process                         | 10             | 25.64      |
| Multicellular organismal process          | 3              | 7.69       |
| Response to stimulus                      | 9              | 23.07      |
| Signaling                                 | 3              | 7.69       |
| <b>Lec4 cells</b>                         |                |            |
| Biological Process                        | No. of Genes   | Percentage |
| Biological Adhesion                       | 3              | 6.52       |
| Biological Regulation                     | 9              | 19.56      |
| Cellular Process                          | 27             | 58.69      |
| Developmental Process                     | 2              | 4.34       |
| Localization                              | 5              | 10.86      |
| Locomotion                                | 2              | 4.34       |
| Metabolic Process                         | 13             | 28.26      |
| Multicellular organismal process          | 2              | 4.34       |
| Response to stimulus                      | 9              | 17.56      |
| Signaling                                 | 4              | 8.69       |
| <b>W5 cells</b>                           |                |            |
| Protein Class                             | No of proteins | Percentage |
| calcium-binding protein                   | 1              | 2.08       |
| <u>cell adhesion molecule</u>             | 2              | 4.16       |
| <u>Chaperone</u>                          | 4              | 8.33       |
| <u>cytoskeletal protein</u>               | 3              | 6.25       |
| <u>membrane traffic protein</u>           | 1              | 2.08       |
| metabolite interconversion enzyme         | 3              | 6.25       |
| <u>nucleic acid metabolism protein</u>    | 3              | 6.25       |
| <u>protein modifying enzyme</u>           | 3              | 6.25       |
| <u>protein-binding activity modulator</u> | 1              | 2.08       |
| <u>scaffold/adaptor protein</u>           | 1              | 2.08       |
| transfer/carrier protein                  | 1              | 2.08       |
| <u>translational protein</u>              | 2              | 4.16       |
| transmembrane signal receptor             | 1              | 2.08       |
| <u>transporter</u>                        | 2              | 4.16       |
| <b>Lec1 cells</b>                         |                |            |
| Protein Class                             | No of Genes    | Percentage |
| calcium-binding protein                   | 1              | 2.56       |
| <u>cell adhesion molecule</u>             | 1              | 2.56       |
| <u>Chaperone</u>                          | 4              | 10.2       |
| <u>cytoskeletal protein</u>               | 3              | 7.69       |
| <u>membrane traffic protein</u>           | 1              | 2.56       |
| metabolite interconversion enzyme         | 3              | 7.69       |
| <u>nucleic acid metabolism protein</u>    | 2              | 5.12       |
| <u>protein modifying enzyme</u>           | 2              | 5.12       |
| <u>protein-binding activity modulator</u> | 1              | 2.56       |
| <u>scaffold/adaptor protein</u>           | 1              | 2.56       |
| transfer/carrier protein                  | 1              | 2.56       |

|                                           |                    |                   |
|-------------------------------------------|--------------------|-------------------|
| <u>translational protein</u>              | 1                  | 2.56              |
| transmembrane signal receptor             | 1                  | 2.56              |
| <u>transporter</u>                        | 2                  | 5.12              |
| <b>Lec4 cells</b>                         |                    |                   |
| <b>Protein Class</b>                      | <b>No of genes</b> | <b>Percentage</b> |
| calcium-binding protein                   | 1                  | 2.17              |
| <u>cell adhesion molecule</u>             | 2                  | 4.34              |
| <u>Chaperone</u>                          | 4                  | 8.69              |
| <u>cytoskeletal protein</u>               | 3                  | 6.52              |
| <u>membrane traffic protein</u>           | 1                  | 2.17              |
| metabolite interconversion enzyme         | 4                  | 8.69              |
| <u>nucleic acid metabolism protein</u>    | 3                  | 6.52              |
| <u>protein modifying enzyme</u>           | 4                  | 8.69              |
| <u>protein-binding activity modulator</u> | 1                  | 2.17              |
| <u>scaffold/adaptor protein</u>           | 1                  | 2.17              |
| transfer/carrier protein                  | 1                  | 2.17              |
| <u>translational protein</u>              | 3                  | 6.52              |
| transporter                               | 2                  | 4.34              |

**Supplementary Table S2.** KEGG pathways of differentially expressed proteins of Lec1 and Lec4 cells analyzed using DAVID tool.

|                                                        |       |            |                      |
|--------------------------------------------------------|-------|------------|----------------------|
| <b>Lec1 cells</b>                                      |       |            |                      |
| Kegg Pathway                                           | Count | Percentage | <i>p</i> -value      |
| Protein processing in Endoplasmic Reticulum            | 5     | 12.8       | 1.4×10 <sup>-3</sup> |
| PI3K-Akt Signaling Pathway                             | 5     | 12.8       | 1.9×10 <sup>-2</sup> |
| Proteoglycans in Cancer                                | 4     | 10.3       | 2.2×10 <sup>-2</sup> |
| Antigen Processing and Presentation                    | 3     | 7.7        | 2.5×10 <sup>-2</sup> |
| Progesterone mediated oocyte maturation                | 3     | 7.7        | 2.7×10 <sup>-2</sup> |
| Prostate Cancer                                        | 3     | 7.7        | 2.8×10 <sup>-2</sup> |
| Estrogen Signaling Pathway                             | 3     | 7.7        | 3.4×10 <sup>-2</sup> |
| RNA Transport                                          | 3     | 7.7        | 9.1×10 <sup>-2</sup> |
| <b>Lec4 cells</b>                                      |       |            |                      |
| Kegg Pathway                                           | Count | Percentage | <i>p</i> -value      |
| Protein processing in Endoplasmic Reticulum            | 6     | 13.0       | 3.6×10 <sup>-4</sup> |
| RNA transport                                          | 4     | 8.7        | 2.5×10 <sup>-2</sup> |
| Arrhythmogenic right ventricular cardiomyopathy (ARVC) | 3     | 6.5        | 2.6×10 <sup>-2</sup> |
| Antigen Processing and Presentation                    | 3     | 6.5        | 3.8×10 <sup>-2</sup> |
| Proteoglycans in Cancer                                | 4     | 8.7        | 4.0×10 <sup>-2</sup> |
| PI3K-Akt Signaling Pathway                             | 5     | 10.9       | 4.1×10 <sup>-2</sup> |
| Focal Adhesion                                         | 4     | 8.7        | 4.2×10 <sup>-2</sup> |
| Regulation of Actin cytoskeleton                       | 4     | 8.7        | 4.5×10 <sup>-2</sup> |
| Estrogen Signaling Pathway                             | 3     | 6.5        | 5.2×10 <sup>-2</sup> |

**Supplementary Table S3.** Enriched gene sets identified by GSEA analysis.

|                   |              |            |                    |
|-------------------|--------------|------------|--------------------|
| <b>Lec1 cells</b> |              |            |                    |
| <b>Name</b>       | <b>Genes</b> | <b>NES</b> | <b>FDR q value</b> |

|                                                                                |                                  |            |                    |
|--------------------------------------------------------------------------------|----------------------------------|------------|--------------------|
| Insulin IGF pathway-protein kinase B signaling cascade                         | <i>IGF-1R</i>                    | -1         | 1                  |
| Glycolysis                                                                     | <i>TPI1, GAPDH</i>               | -1         | 1                  |
| Parkinson disease                                                              | <i>HSPA8, HSPA5, YWHAG</i>       | -1         | 1                  |
| Alzheimer's disease-presenilin pathway                                         | <i>MMP14, LRP1</i>               | 1          | 1                  |
| Nicotinic acetylcholine receptor signaling pathway                             | <i>MYH9</i>                      | 1          | 1                  |
| Inflammation mediated by chemokine and cytokine signaling pathway              | <i>MYH9, ITGB1</i>               | 1          | 1                  |
| Huntington's disease                                                           | <i>GAPDH</i>                     | 1          | 1                  |
| EGF receptor signaling pathway                                                 | <i>YWHAG</i>                     | 1          | 1                  |
| Nicotine pharmacodynamics pathway                                              | <i>FLNA</i>                      | 1          | 1                  |
| PNAT                                                                           | <i>FLNA</i>                      | 1          | 1                  |
| Insulin IGF Pathway-Mitogen activated protein kinase kinase map kinase cascade | <i>IGF-1R</i>                    | -1         | 1                  |
| Cytoskeletal regulation by Rho GTPase                                          | <i>MYH9</i>                      | 1          | 1                  |
| Integrin signaling pathway                                                     | <i>FLNA, ITGB1</i>               | 1          | 1                  |
| Apoptosis signaling pathway                                                    | <i>HSPA8, HSPA5</i>              | -1         | 1                  |
| FGF signaling pathway                                                          | <i>YWHAG</i>                     | 1          | 1                  |
| <b>Lec4 cells</b>                                                              |                                  |            |                    |
| <b>Name</b>                                                                    | <b>Genes</b>                     | <b>NES</b> | <b>FDR q value</b> |
| Glycolysis                                                                     | <i>TPI1, GAPDH</i>               | 0.9156     | 1                  |
| Parkinson disease                                                              | <i>HSPA8, HSPA5, YWHAG</i>       | -1         | 1                  |
| Alzheimer's disease-presenilin pathway                                         | <i>MMP14, LRP1</i>               | 1          | 1                  |
| Nicotinic acetylcholine receptor signaling pathway                             | <i>MYH9</i>                      | 1          | 1                  |
| Inflammation mediated by chemokine and cytokine signaling pathway              | <i>MYH9, ITGB1</i>               | 1          | 1                  |
| Huntington's disease                                                           | <i>GAPDH</i>                     | 1          | 1                  |
| EGF receptor signaling pathway                                                 | <i>YWHAG</i>                     | -1         | 1                  |
| Nicotine pharmacodynamics pathway                                              | <i>FLNA</i>                      | 1          | 1                  |
| PNAT                                                                           | <i>FLNA</i>                      | 1          | 1                  |
| Cytoskeletal regulation by Rho GTPase                                          | <i>MYH9</i>                      | 1          | 1                  |
| Integrin signaling pathway                                                     | <i>FLNA, ITGB1, ITGB5, ACTN4</i> | 1          | 1                  |
| Apoptosis signaling pathway                                                    | <i>HSPA8, HSPA5</i>              | -1         | 1                  |
| FGF signaling pathway                                                          | <i>YWHAG</i>                     | -1         | 1                  |

**Supplementary Table S4.** Summary of top associated networks in Lec1 and Lec4 cells following Ingenuity Pathway Analysis (IPA).

|                                                                                                           |              |                        |
|-----------------------------------------------------------------------------------------------------------|--------------|------------------------|
| <b>Lec1 cells</b>                                                                                         |              |                        |
| <b>Associated Network Function</b>                                                                        | <b>Score</b> | <b>Focus Molecules</b> |
| Protein Degradation, Protein Synthesis, Post-translational Modification                                   | 28           | 17                     |
| Cellular Assembly and organization, Cellular Function and Maintenance, Embryonic Development              | 25           | 12                     |
| Cell-to-Cell signaling and Interaction, Cellular Movement, Cell Death and Survival                        | 17           | 7                      |
| Cell Death and Survival, Cellular Function and maintenance, Hematological system Development and Function | 12           | 4                      |

| <b>Lec4 cells</b>                                                                                         |              |                        |
|-----------------------------------------------------------------------------------------------------------|--------------|------------------------|
| <b>Associated Network Function</b>                                                                        | <b>Score</b> | <b>Focus Molecules</b> |
| Protein Synthesis, Post translational Modification, Protein Folding                                       | 38           | 18                     |
| Cellular Movement, Cell-to-Cell signaling and Interaction, Cellular Assembly and organization             | 35           | 15                     |
| Cellular Development, Cellular Growth and Proliferation, Tumor Development                                | 26           | 9                      |
| Cell Death and Survival, Cellular Function and maintenance, Hematological system Development and Function | 3            | 5                      |



**Supplementary Table S5.** Docked scores of three algorithms for IQ domain of IQGAP1 and kinase domain of IGF-1R.

| ZDOCK |             | ClusPro |                | FireDock |               |
|-------|-------------|---------|----------------|----------|---------------|
| Pose  | ZRank Score | Cluster | Weighted Score | Rank     | Global Energy |
| 1     | -118.0 *    | 0       | -925.8         | 1        | -44.8 *       |
| 2     | -115.1      | 1       | -1015.4 *      | 2        | -35.0         |
| 3     | -111.4      | 2       | -980.8         | 3        | -34.0         |
| 4     | -103.9      | 3       | -933.8         | 4        | -32.1         |
| 5     | -103.6      | 4       | -921.5         | 5        | -25.7         |

\* The binding site of this pose is common for the three algorithms.

**Supplementary Table S6.** Intermolecular interactions observed in top docked pose identified by ZDOCK.

| Types of Interaction      | Interacting Residues |                        |
|---------------------------|----------------------|------------------------|
|                           | IQ Domain (IQGAP1)   | kinase Domain (IGF-1R) |
| Hydrogen Bonds            | PHE771               | LYS1023                |
|                           | ILE779               | ARG1064                |
|                           | TRP786, LYS793       | ASP1146                |
|                           | LYS792               | GLU1276                |
| Electrostatic interaction | LYS790               | ASP1146                |
|                           | LYS793               | GLU1118, GLU1271       |
|                           | ASP797               | LYS1111                |
| Hydrophobic interaction   | TYR789               | VAL1277                |

**Supplementary Table S7.** Identified glycoproteins with there accession numbers; descriptions are shown.

| Accession | Description                                                                                          |
|-----------|------------------------------------------------------------------------------------------------------|
| Q6P5E4    | UDP-glucose:glycoprotein glucosyltransferase 1 OS = Mus musculus OX = 10090 GN = Ugg1t PE = 1 SV = 4 |
| G5E8F8    | Integrin beta OS = Mus musculus OX = 10090 GN = Itgb5 PE = 1 SV = 1                                  |
| F1LS79    | Chondroitin sulfate proteoglycan 4 OS = Rattus norvegicus OX = 10116 GN = Cspg4 PE = 4 SV = 1        |
| Q61543    | Golgi apparatus protein 1 OS = Mus musculus OX = 10090 GN = Glg1 PE = 1 SV = 1                       |
| O35112    | CD166 antigen OS = Rattus norvegicus OX = 10116 GN = Alcam PE = 1 SV = 1                             |
| Q63617    | Hypoxia up-regulated protein 1 OS = Rattus norvegicus OX = 10116 GN = Hyou1 PE = 1 SV = 1            |
| P09055    | Integrin beta-1 OS = Mus musculus OX = 10090 GN = Itgb1 PE = 1 SV = 1                                |
| P27046    | Alpha-mannosidase 2 OS = Mus musculus OX = 10090 GN = Man2a1 PE = 1 SV = 2                           |
| Q9ERF7    | Intercellular adhesion molecule 1 OS = Cricetulus griseus OX = 10029 GN = ICAM1 PE = 2 SV = 1        |
| P97629    | Leucyl-cystinyl aminopeptidase OS = Rattus norvegicus OX = 10116 GN = Lnpep PE = 1 SV = 1            |
| E9QB01    | Neural cell adhesion molecule 1 OS = Mus musculus OX = 10090 GN = Ncam1 PE = 1 SV = 2                |
| B2RXS4    | Plexin-B2 OS = Mus musculus OX = 10090 GN = Plxnb2 PE = 1 SV = 1                                     |
| G3V679    | Transferrin receptor protein 1 OS = Rattus norvegicus OX = 10116 GN = Tfrc PE = 1 SV = 1             |
| P12382    | ATP- dependent 6-phosphofructokinase, liver type OS = Mus musculus OX = 100                          |
